# Supplementary material for: Glyoxalase 1 expression is associated with an unfavorable prognosis of oropharyngeal squamous cell carcinoma
Source: BMC Cancer. 2017 May 26;17:382. doi: 10.1186/s12885-017-3367-5 (PMC5446730; doi:10.1186/s12885-017-3367-5)
Supplement: Supplementary file 4 — Table S4. Summary of the GLO1 protein level and localization as well as patient characteristics (XLSX 25 kb) [file 12885_2017_3367_MOESM4_ESM.xlsx]

## Sheet: Blatt1
Additional Table S4. Summary of the GLO1 protein level and localization as well as patient characteristics
No.	GLO1 protein level	GLO1 location	GLO1 protein level & localization	T stage	N stage	M stage	Clinical staging	Pathological grading	DSS event	DSS [months]	PFS event	PFS [months]	Tobacco	Alcohol	HPV16 status
1	high	cyt	others	4	1	0	IV	2	yes	27.5667	yes	24.2	current	current	non-related
2	low	cyt	others	3	0	0	III	1	no	178.033	no	178.033	current	current	non-related
3	high	cyt	others	2	2	0	IV	3	no	138.333	no	138.333	current	current	related
4	low		others	3	1	0	III	3	no	88.2	no	88.2	never	current	related
5	high	cyt	others	2	0	0	II	3	no	110.7	no	110.7	current	current	related
6	high	nuc	high/nuc	2	2c	x	IV	2	yes	7.53333	yes	7.53333	former	current	related
7	low	cyt	others	3	2b	0	IV	2	no	182.267	yes	146.8	current	current
8	low	cyt	others	3	2b	0	IV	2	no	153.567	no	153.567	current	current	related
9	low		others	4	2c	0	IV	2	no	102.233	yes	66.5333	current	current	related
10	low	cyt	others	2	0	0	II	3	no	113.6	yes	61.7333	current	current	non-related
11	high	cyt	others	4	2	0	IV	2	yes	13.6667	yes	11.9667	current	current	non-related
12	low	nuc	others	4	3	0	IV	2	yes	13.6333	yes	9.23333	current	current	non-related
13	high	cyt	others	2	2b	0	IV	3	yes	103.733	yes	6.76667	current	never	related
14	high	nuc	high/nuc	4	2	0	IV	2	yes	8.76667	yes	7.13333	current	current	non-related
15	high	cyt	others	2	2c	0	IV	3	no	171.233	no	171.233	current	current	non-related
16	low		others	3	2b	1	IV	2	yes	3	yes	3	current	current	non-related
17	high	cyt	others	2	1	0	III	2	no	206.367	yes	195.433	former	current	non-related
18	low	cyt	others	4	1	0	IV	2	no	167.3	no	167.3	former	former	non-related
19	high	cyt	others	3	2b	0	IV	2	no	164.5	no	164.5	current	current	non-related
20	low	cyt	others	3	2b	0	IV	2	no	62.5333	no	62.5333	current	current	non-related
21	high	cyt	others	2	0	0	II	1	yes	146.767	yes	131	current	former	non-related
22	high	nuc	high/nuc	4	2c	0	IV	2	yes	13.8333	yes	8.96667	current	current	non-related
23	high	nuc	high/nuc	4	2c	0	IV	3	yes	11.6	yes	6	current	current	non-related
24	high	nuc	high/nuc	4	2	0	IV	2	yes	9.6	yes	6.93333	current	current	non-related
25	low	nuc	others	4	2b	0	IV	2	yes	13.8	yes	7.9	current	current	non-related
26	high	nuc	high/nuc	4	2	0	IV	2	yes	4.6	yes	4.6	current	current	non-related
27	low		others	2	1	0	III	2	no	159.933	yes	102.567	current	current	non-related
28	low	cyt	others	3	0	0	III	2	no	71.2333	yes	5.26667	current	current	non-related
29	high	cyt	others	4	2c	0	IV	3	yes	20.9667	yes	13.7333	current	current	non-related
30	low		others	4	2b	0	IV		yes	38.7333	yes	7.5	current	former	non-related
31	high	nuc	high/nuc	4	2c	0	IV	3	yes	5.36667	yes	5.4	current	current	non-related
32	low	nuc	others	3	1	0	III	3	yes	20.7	yes	16.7	current	current	non-related
33	high	cyt	others	3	0	0	III	2	no	144.233	yes	25.4333	current	current	related
34	low	cyt	others	3	2b	0	IV	2	no	98.3	no	98.3	never	current	related
35	low	cyt	others	3	2b	0	IV	2	yes	52.0667	yes	52.2	current	current	non-related
36	low	cyt	others	4	0	0	IV	2	yes	32.8667	yes	24.4667	current	current	non-related
37	low	nuc	others	4	2a	0	IV	1	yes	28.6	yes	3.2	current	current	related
38	high	nuc	high/nuc	4	2c	0	IV	2	yes	35.1333	yes	13.4667	current	former	non-related
39	low		others	2	0	0	II	2	yes	33.7333	yes	12.8667	current	former	non-related
40	high	nuc	high/nuc	4	0	0	IV	1	no	25.3	no	25.3	current	current	related
41	high	cyt	others						yes	9.43333	yes	3.93333	current	current	non-related
42	high	cyt	others	4	2c	0	IV	x	yes	81.6667	yes	81.6667	current	current	non-related
43	low	nuc	others	3	2b	0	IV	3	no	137	no	137	former	current	non-related
44	high	cyt	others	4	2	0	IV	3	yes	3.56667	yes	3.56667	current	former	non-related
45	high	cyt	others	4	2	1	IV	1	yes	7.2	yes	5.46667	current	current	non-related
46	low	nuc	others	1	2b	0	IV	3	no	158.833	no	158.833	current	current	non-related
47	high	nuc	high/nuc	4	2c	0	IV	2	yes	6.13333	yes	4.5	current	current	non-related
48	low		others	2	0	0	II	2	no	137.2	no	137.2	current	current	non-related
49	high	nuc	high/nuc	2	0	0	II		yes	5.43333	yes	5.43333	current	current	non-related
50	low	nuc	others	4	1	0	IV		no	136.5	no	136.5	current
51	high	cyt	others	2	1	0	III	2	yes	23.5667	yes	16.8667	current	current	non-related
52	low	cyt	others	2	2c	0	IV	3	yes	9.53333	yes	9.53333	current	current	non-related
53	high	nuc	high/nuc	4	2c	0	IV	2	yes	30.6333	yes	14.3667	former	current	non-related
54	low	cyt	others	4	2c	0	IV		yes	61.7	yes	57.9	current	current	non-related
55	low	cyt	others	4	2c	0	IV		yes	32.0333	yes	4.83333	current	never	non-related
56	high	cyt	others	4	2b	0	IV	1	no	135.567	no	135.567	current	current	non-related
57	low	cyt	others	2	1	0	III	2	no	126	no	126	current	former	non-related
58	high	cyt	others	4	2c	0	IV	1	yes	25.5667	yes	8.83333	current	current	non-related
59	high	nuc	high/nuc	4	2c	0	IV	x	yes	18.7333	yes	18.7333	current	current	non-related
60	low	cyt	others	1	2b	0	IV	2	yes	38.3	yes	38.3	current	current	non-related
61	low	cyt	others	4	2c	0	IV	2	yes	12.8333	yes	4.93333	current	former	non-related
62	low	cyt	others	2	2c	0	IV	x	yes	22.3667	yes	10	former	former	non-related
63	low	cyt	others	3	1	0	III	2	yes	20.2667	yes	20.2667	current	former	non-related
64	high	nuc	high/nuc	4	3	0	IV		yes	55.0667	yes	37.5333	current	current	non-related
65	high	cyt	others	2	0	0	II		no	82.3333	yes	70.6333	current	current	non-related
66	high	cyt	others	2	2a	0	IV	3	yes	12.0333	yes	5.6	current	current	non-related
67	high	cyt	others	2	3	0	IV	2	no	86.8333	no	86.8333	former	current	related
68	low	cyt	others	2	2b	0	IV	2	no	122.333	no	122.333	never	current	related
69	high	nuc	high/nuc	4	0	0	IV	2	no	106.333	yes	23.6	current	current	non-related
70	low	nuc	others	4	2b	0	IV	2	yes	11.5	yes	8.5	current	current	non-related
71	low	cyt	others	4	2c	1	IV		yes	16.5667	yes	5.13333	never	current	non-related
72	high	nuc	high/nuc	4	2c	0	IV		yes	114.933	yes	22.1667	current	current	non-related
73	high	cyt	others	2	0	0	II	x	yes	34.8333	yes	13.8333	current	current	non-related
74	high	cyt	others	2	1	0	III	3	yes	50.0333	yes	47.4667	current	current	non-related
75	high	cyt	others	4	2c	0	IV	x	yes	4.76667	yes	4.76667	current	current	non-related
76	high	cyt	others	2	3	1	IV	2	yes	2.93333	yes	2.93333	current	current	non-related
77	low		others	2	1	0	III	3	no	15.2	yes	15	current	current	non-related
78	high	nuc	high/nuc	4	2c	0	IV		yes	19	yes	12	current	current	non-related
79	low		others	4	2b	0	IV		yes	50	yes	44.8	current	current	non-related
80	low	nuc	others	2	0	0	II	2	no	104.933	no	104.933	current	current	non-related
81	high	cyt	others	3	2c	0	IV	3	no	108.533	no	108.533	former	current	non-related
82	low	cyt	others	1	1	0	III	2	no	87.3333	no	87.3333	current	current	non-related
83	high	cyt	others	2	0	0	II	3	no	106.833	no	106.833	former	current	non-related
84	high	cyt	others	1	1	0	III	3	no	100.867	yes	4.83333	current	current	non-related
85	high	cyt	others	4	2b	0	IV	3	yes	38.6	yes	11.0333	current	current	non-related
86	high	cyt	others	4	2c	0	IV		yes	19.1667	yes	15.3	current	current	related
87	high	nuc	high/nuc	2	1	0	III	2	no	10.4667	no	10.4667	current	current	non-related
88	high	nuc	high/nuc	4	3	0	IV	3	yes	17.1	yes	5.63333	current	current	non-related
89	high	cyt	others	2	2c	0	IV	3	yes	7.5	yes	4.93333	current	current	non-related
90	high	nuc	high/nuc	4	2b	1	IV	3	yes	6.1	yes	6.1	current	current	non-related
91	high	cyt	others	2	1	0	III	3	yes	16.7	yes	10.1	former	former	non-related
92	high	cyt	others	4	2c	0	IV	2	yes	10.8667	yes	10.2	current	current	non-related
93	high	cyt	others	3	2b	0	IV	2	yes	27.4667	yes	21.8	current	current	non-related
94	high	cyt	others	3	2b	0	IV	3	yes	28.1333	yes	10.4	current	current	non-related
95	high	nuc	high/nuc	4	3	0	IV	x	yes	18.3	yes	6.6	current	current	non-related
96	high	cyt	others	4	2b	0	IV	3	yes	82.5	yes	80.0667	former	former	non-related
97	low		others	3	1	0	III		yes	32.6667	yes	32.6667	current	current	non-related
98	low	cyt	others	1	0	0	I	2	no	8.86667	no	8.86667	current	current	non-related
99	high	cyt	others	4	2b	1	IV	3	yes	8.63333	yes	8.63333	current	current	non-related
100	high	cyt	others	4	2c	0	IV		yes	3.7	yes	3.7	current	current	non-related
101	high	nuc	high/nuc	2	0	0	II	3	yes	65.4333	yes	65.4333	former	current	non-related
102	low		others	3	2a	0	IV	x	yes	27.6333	yes	27.6333	former	current	non-related
103	low		others	2	1	0	III	3	no	71.8667	no	71.8667	never	current	related
104	low		others	2	0	0	II	2	yes	33.9667	yes	32	current	current	non-related
105	low	cyt	others	2	2b	0	IV	3	no	71.4	no	71.4	never	current	related
106	high	cyt	others	3	0	0	III	3	no	73.1333	no	73.1333	current	current	non-related
107	high	cyt	others	2	2b	0	IV	1	no	66.6333	no	66.6333	current	former	related
108	high	nuc	high/nuc	1	0	0	I	2	no	50.2	no	50.2	current	former	non-related
109	low	nuc	others	3	0	0	III	2	yes	54.3667	yes	21.7667	current	current	non-related
110	high	nuc	high/nuc	4	2b	0	IV	3	no	47.4	no	47.4	current	never	non-related
111	high	cyt	others	3	2b	0	IV	2							related
112	high	cyt	others	4	2b	0	IV	3	yes	25.7333	yes	8.06667	current	current	non-related
113	high	cyt	others	1	2b	0	IV	2	no	41.3667	no	41.3667	never
114	high	nuc	high/nuc	4	2c	0	IV	x	yes	13.3333	yes	13.3333
115	low	cyt	others	1	0	0	I	2	no	31.9	no	31.9		current
116	low	nuc	others	2	1	0	III	3	yes	10.2333	yes	9.66667	never	current	non-related
117	high	nuc	high/nuc	4	2c	1	IV	2	yes	3.13333	yes	3.13333	current	current	non-related
118	low	cyt	others	2	1	0	III	2	no	40.6	no	40.6	never	never
119	high	cyt	others	1	2b	0	IV	2	no	31.2	no	31.2	current	current	related
120	high	cyt	others	1	2b	0	IV	2	no	19.0667	no	19.0667	current	current
121	low		others	2	0	0	II	3	no	31.7333	no	31.7333
122	low		others	2	2b	0	IV	2	yes	8.6	yes	8.46667	never	never	non-related
123	high	cyt	others	4	3	0	IV		no	42.3667	yes	10.8	never	never
124	high	cyt	others	2	2b	0	IV	3	no	27.1333	no	27.1333	never	current	related
125	high	cyt	others	1	0	0	I	2	no	24.4	no	24.4	never	never	non-related
126	low		others	4	2a	x	IV	3	no	24.5	no	24.5	current	current	non-related
127	low	cyt	others	2	2b	0	IV	3	yes	14.9667	yes	8.1	current	former	non-related
128	high	nuc	high/nuc	3	2b	0	IV	2	yes	19.1	yes	10.4333	current	current	related
129	low		others	2	2c	0	IV	2	yes	3.56667	yes	3.56667	current	current	related
130	high	cyt	others	2	2b	0	IV	2	no	21.4333	no	21.4333	never	current	related
131	low	cyt	others	2	2b	0	IV	3	no	22.3	no	22.3	current	former	non-related
132	low	cyt	others	3	0	0	III	3	no	29.6	no	29.6	never	current	related
133	high	cyt	others	1	2b	0	IV	3	no	21.9	no	21.9	current	former	non-related
134	low	cyt	others	3	2b	0	IV	2	no	19.5667	no	19.5667	never	current	related
135	low	cyt	others	2	0	0	II	3	no	29.3667	no	29.3667	current	never	non-related
136	high	cyt	others	2	2b	0	IV	3	no	15.4333	no	15.4333	current	never	related
137	low	nuc	others	2	2b	0	IV	3	no	16.5333	no	16.5333	current	never	related
138	high	cyt	others	3	1	0	III	2	no	17.5	no	17.5	current	former	non-related
139	low	nuc	others	2	1	0	III	3	no	17.7	no	17.7	current	never	non-related
140	high	nuc	high/nuc	1	0	0	I	3	no	17.5667	no	17.5667	current	current	non-related
141	high	cyt	others	2	0	0	II	3	no	76.3333	yes	40.9	current	current
142	low	cyt	others	1	2a	0	IV	2	no	40.8	no	40.8	current	never
143	low	cyt	others	2	2c	0	IV	3	no	7.23333	no	7.23333
144	high	cyt	others	1	0	0	I	2	no	32.5	yes	17.2667	current	current
145	high	cyt	others	4	2b	0	IV	2	yes	21.9333	yes	11.2667	current	current
146	low	nuc	others	1	2b	0	IV	3	no	27.2333	no	27.2333
147	high	cyt	others	2	1	0	III	3	no	45.8333	yes	10.9333
148	low	cyt	others	3	2b	0	IV	2	no	43.9333	yes	11.8	current	current
149	low	nuc	others	1	0	0	I	2	no	23.5667	no	23.5667	current	never	non-related
150	high	cyt	others	3	1	0	III	2	yes	5.66667	yes	4.16667	never	current
151	high	cyt	others	4	3	x	IV	x	no	27.7333	yes	6.9	current
152	high	cyt	others	2	2	0	IV	3	no	12.8333	yes	4.13333	current	former	non-related
153	low	cyt	others	2	2a	0	IV	3	no	10.3333	no	10.3333	never	current	related
154	low		others	3	2c	0	IV	3	no	10.6667	no	10.6667	never	current	related
155	high	cyt	others	3	2b	0	IV	3	yes	8.7	yes	7.86667	current	current	related
156	high	cyt	others	2	2b	0	IV	2	no	12.5667	yes	11.8667	current	current	non-related
GLO1 protein level
	low	1-8
	high	9-16
GLO1 localization
	nuc	predominant nuclear localization
	cyt	predominant cytoplasmic localization
GLO1 protein level & localization
	high/nuc	high IRS and predominant nuclear localization
	others	all other GLO1 staining patterns
DSS (disease-specific survival)
PFS (progression-free survival)
HPV16 status
	non-related	viral DNA negative & viral DNA positive but transcript negative
	related	viral DNA and transcript positive
